# Supplementary material
Source: MDPI journal article supplement (https://www.mdpi.com/2673-9976/11/1/35)

**IECPS  
2021**

# The 2nd International Electronic Conference on Plant Science

01-15 DECEMBER 2021 | ONLINE

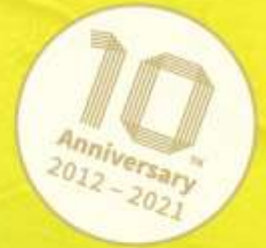

Chaired by **DR. ADRIANO SOFO**

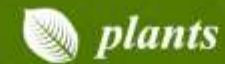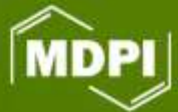

## **Overexpression of Plant Specific Insert from cardosin B (PSI B) in Arabidopsis correlates with cell responses to stresses**

**Inês Moura<sup>1</sup>, Susana Pereira<sup>1,2</sup>, Ana Séneca<sup>1,2</sup>, José Pissarra<sup>1,2</sup> and Cláudia Pereira<sup>1,2\*</sup>**

<sup>1</sup> Faculdade de Ciências da Universidade do Porto, Rua do Campo Alegre, s/nº, 4169-007, Porto.

<sup>2</sup> GreenUPorto - Sustainable Agrifood Production Research Center, Rua do Campo Alegre, s/nº, 4169-007, Porto, Portugal.

\* Correspondence: cpereira@fc.up.pt

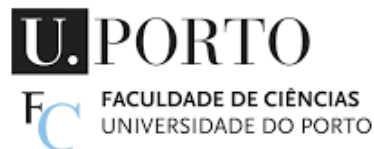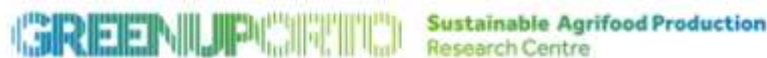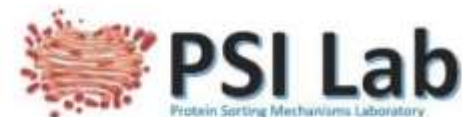

**Abstract:** Under abiotic stress, several changes occur in cells both regarding their physiology and cellular mechanisms. Plants have developed modifications in the production and trafficking of proteins and remodelling of endomembranes to overcome stress conditions. The alteration of the targeting of proteins to the vacuole by shifting their transport towards an unconventional, Golgi-independent, route is a good example. Plant Specific Inserts (PSIs) are known to mediate such routes and our goal was to evaluate if transgenic *Arabidopsis* plants overexpressing PSI B respond differently when subjected to different abiotic stresses (osmotic, oxidative, salt, and metal). The results obtained point to a differential expression of PSI B-mCherry depending on the type of stress and a decrease of cellular and cytoplasmatic movement in all stress conditions.

**Keywords:** Abiotic stress; Plant Specific Insert; protein trafficking; unconventional routes.

# Introduction

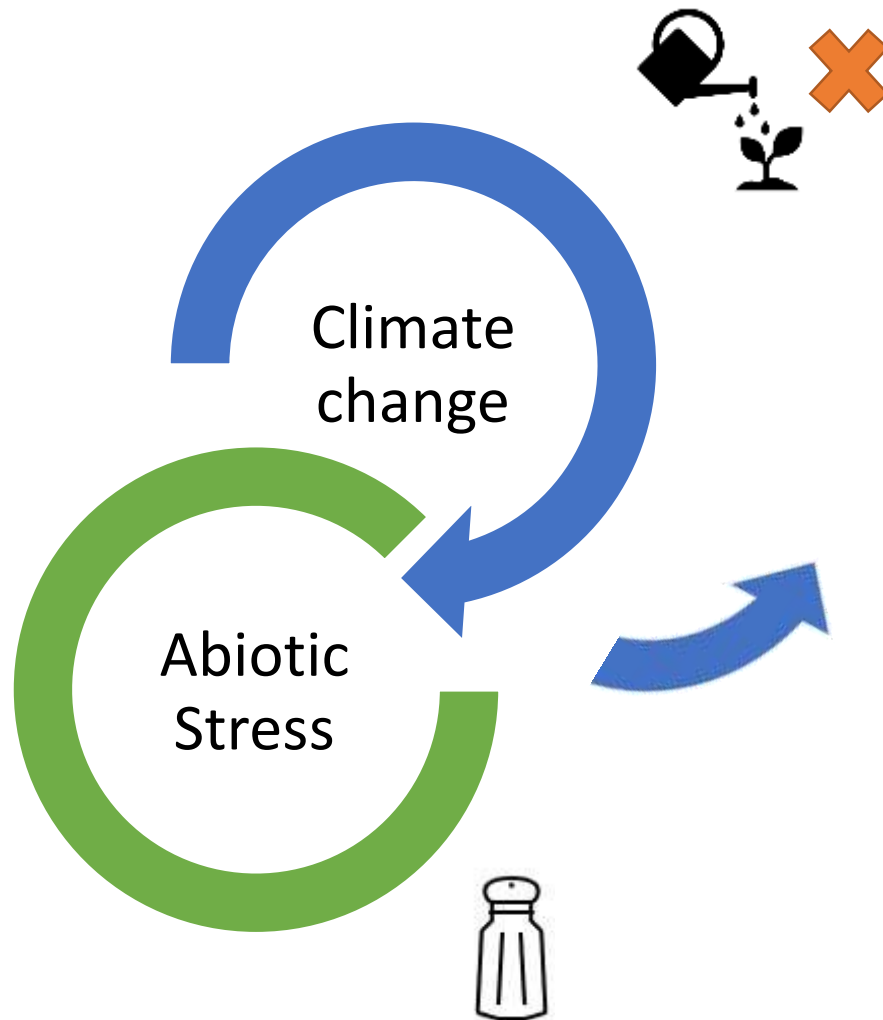

- Stomatal closure
- Decreased photosynthetic activity
- Altered cell wall elasticity
- ROS production

# Introduction

## Plant Specific Insert

Independent domain,  
with approximately 100  
aminoacidic

ability to interact  
with membranes

Highly conserved in  
innumerous species

redirect secreted proteins  
to the vacuole through  
different pathways

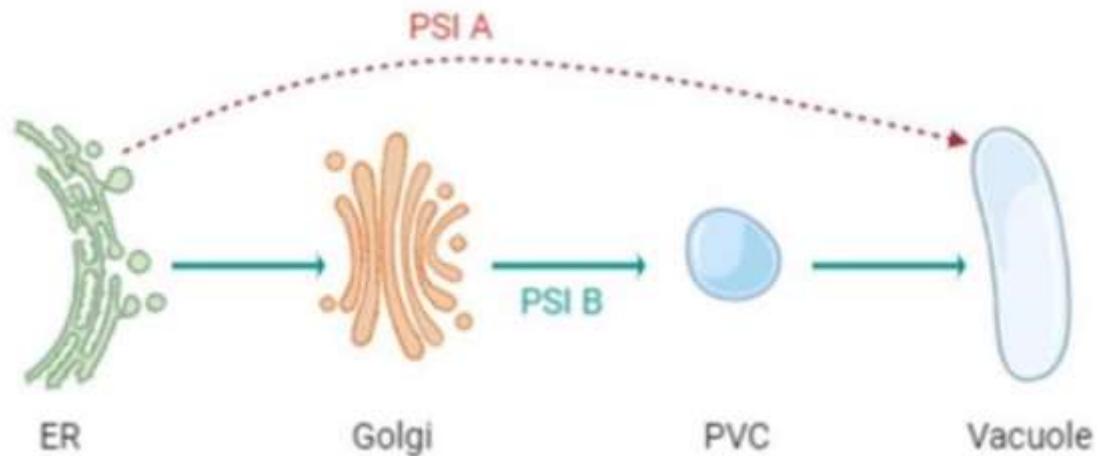

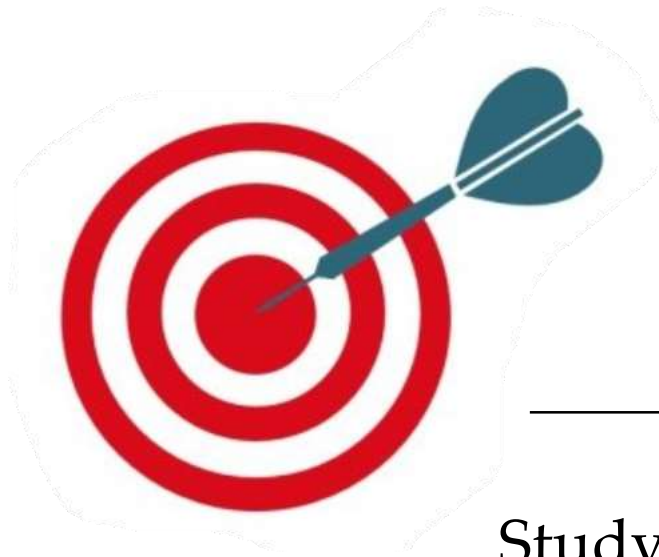

# Goal:

---

Study the expression levels of PSIB and its biosynthetic pathways in transgenic Arabidopsis plants overexpressing this domain coupled to m-Cherry fluorescent protein, in physiological and under abiotic stress conditions

# Experiments

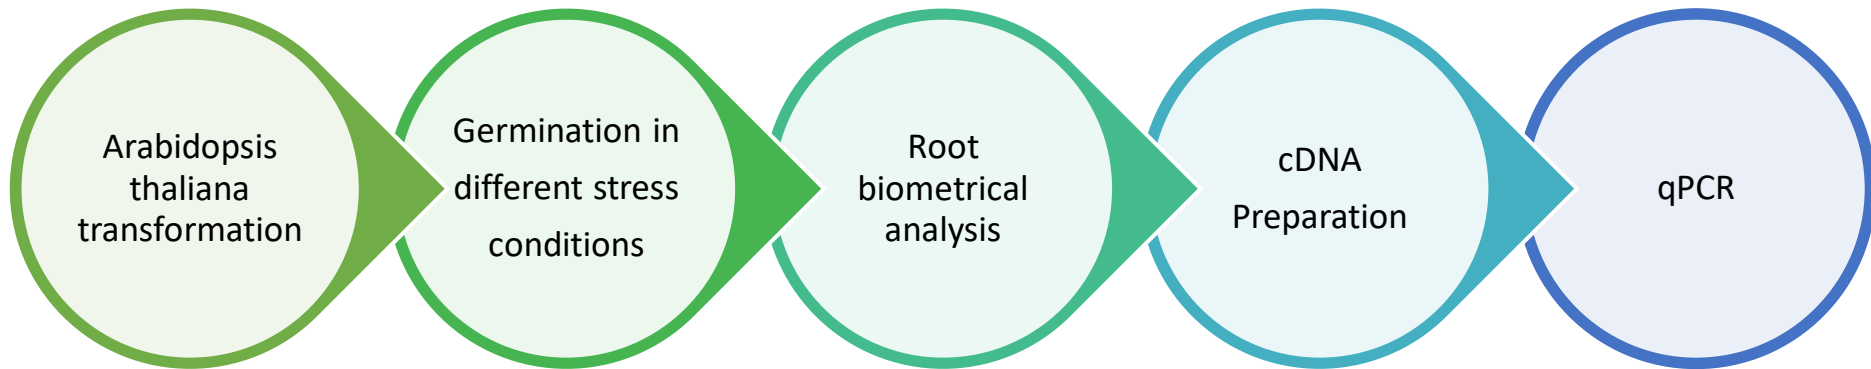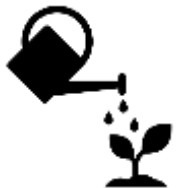

## Stress Conditions

S1 - 50 mM NaCl

S2 - 100 mM NaCl

H1 – 50 mM  
Manitol

H2 – 100 mM  
Manitol

Ox- 0,5 mM H<sub>2</sub>O<sub>2</sub>

Zn – 150 μM  
ZNSO<sub>4</sub>

# Results

## PSI B expression changes in plants under abiotic stress

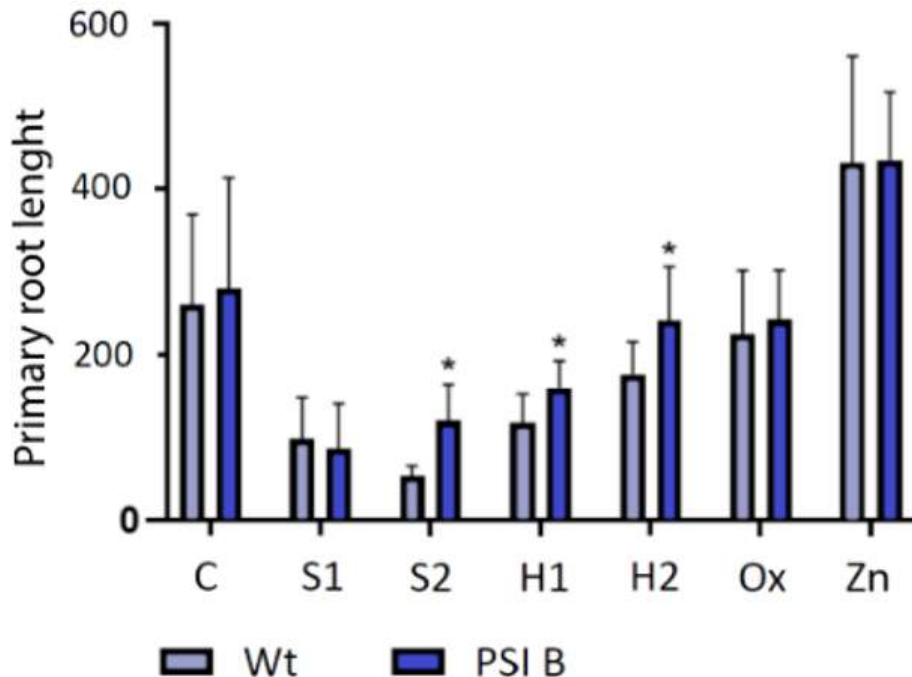

- S1- decrease in root development in both plants (Wt and PSI B)
- S2- significant increase in the size of roots in plants overexpressing PSI B
- H1 and H2- same tendency as S2
- Ox and Zn- no changes are observed

# Results

## PSI B expression changes in plants under abiotic stress

- PSI B-mCherry is upregulated in both H1, H2 and S1
- PSI B-mCherry is downregulated in Ox and Zn

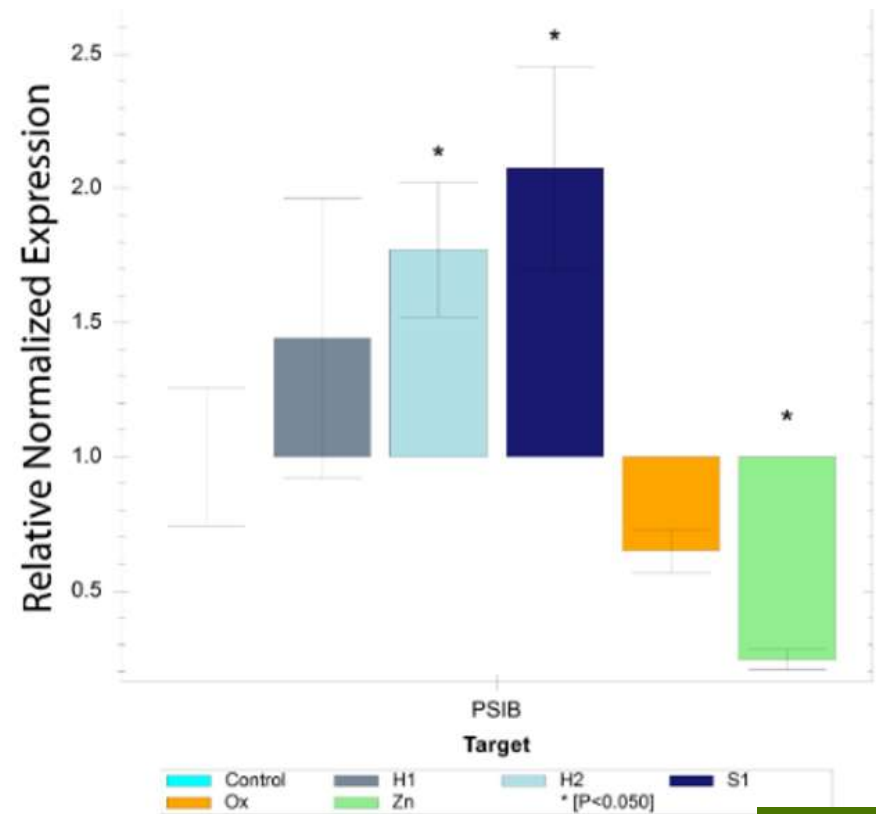



# Discussion

## PSI B expression changes in plants under abiotic stress

At high salt conditions, there is a significant increase in the root length in the transformed plants, suggesting an increased stress tolerance that may be triggered at certain concentrations

The higher and mild water stress conditions also showed to have significant changes in roots length.

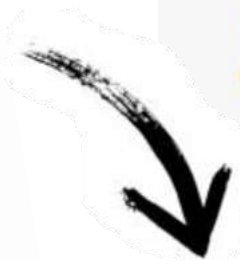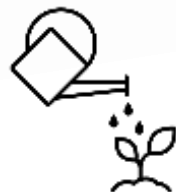

increased tolerance in order to mitigate the negative effects of environmental adversities

# Discussion

## PSI B expression changes in plants under abiotic stress

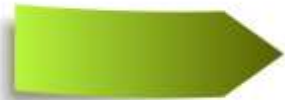

The downregulation of PSI B-mCherry on Ox and Zn stress, reinforces the importance of this domain in Water and salinity stress, and may indicate a role in processes related with cellular homeostasis and water control.

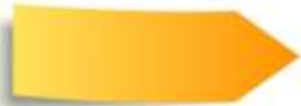

Overexpression in salt and mild hydric stress suggests that degradation of storage proteins occurs in order to overcome and tolerate these restricted conditions.

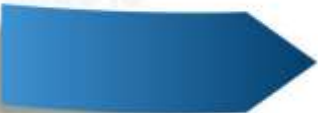

The PSI may then be associated with the defense and developmental system, and yet operate by distinct mechanisms

# Discussion

## PSI B expression changes in plants under abiotic stress

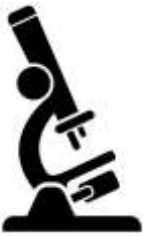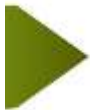

Analysis of PSI B-mCherry localization in roots showed a marked decrease in intracellular and cytoplasmic movements under all stress conditions

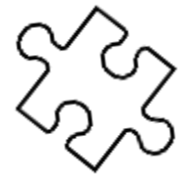

Can vesicle movement be inhibited by stress?

# Discussion

## PSI B expression changes in plants under abiotic stress

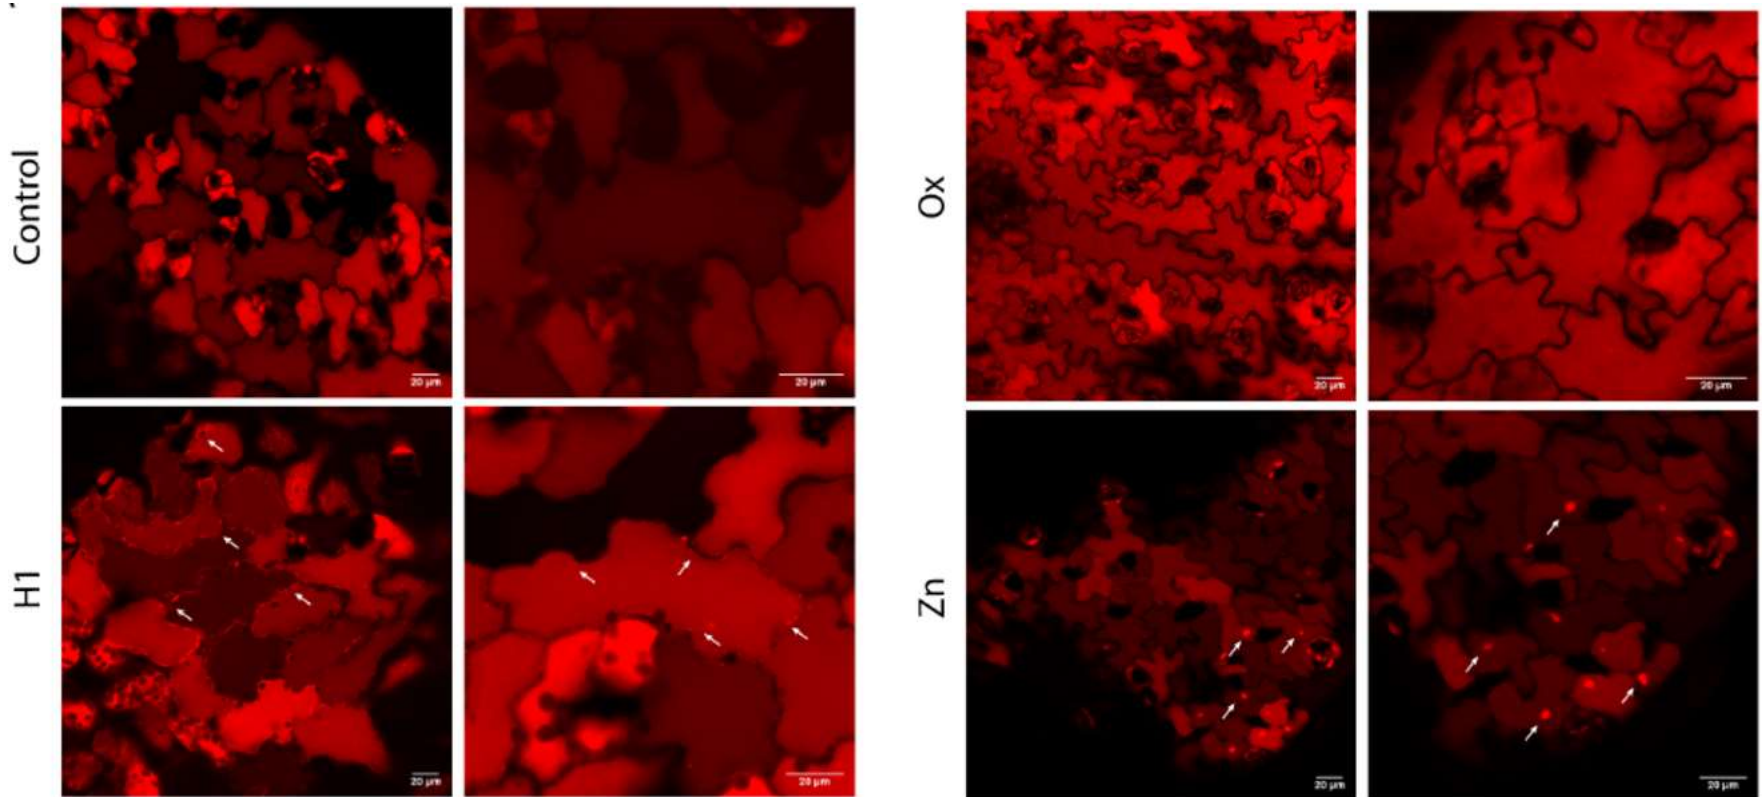

# Conclusion

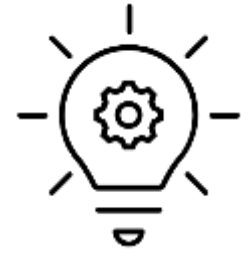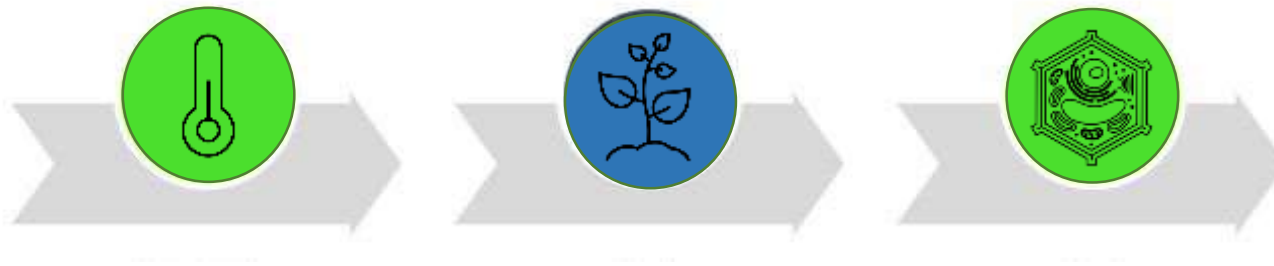

PSI B has an active role in adaptation and eventually tolerance mechanisms against abiotic stress

# Supplementary Materials

Movement of PSI B-mCherry-labeled compartment

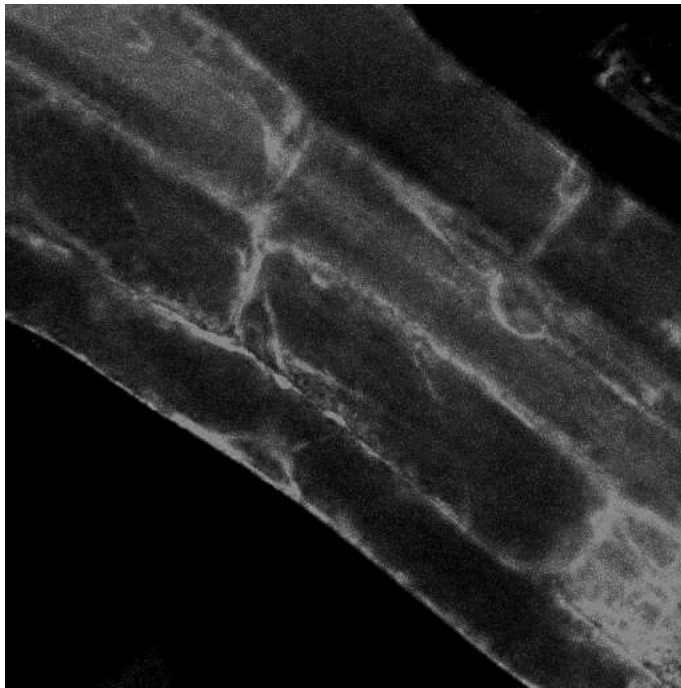

Control

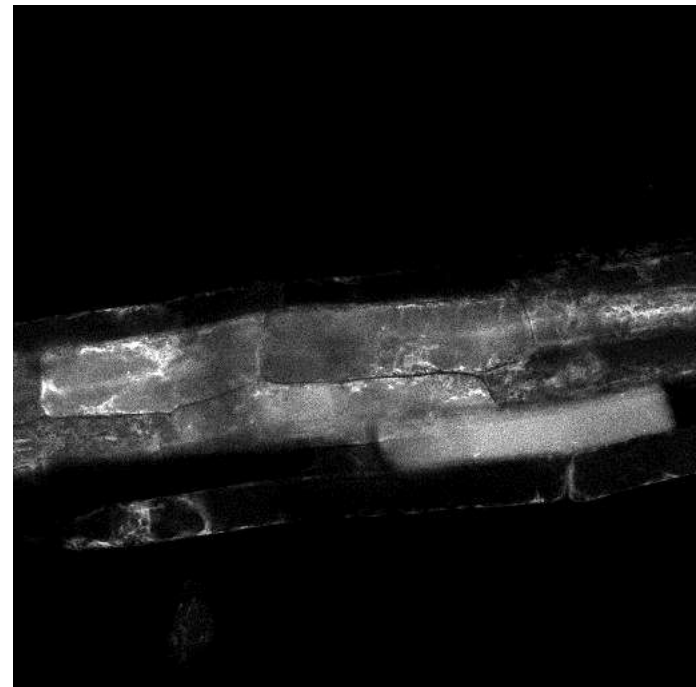

H1

# Supplementary Materials

Movement of PSI B-mCherry-labeled compartment

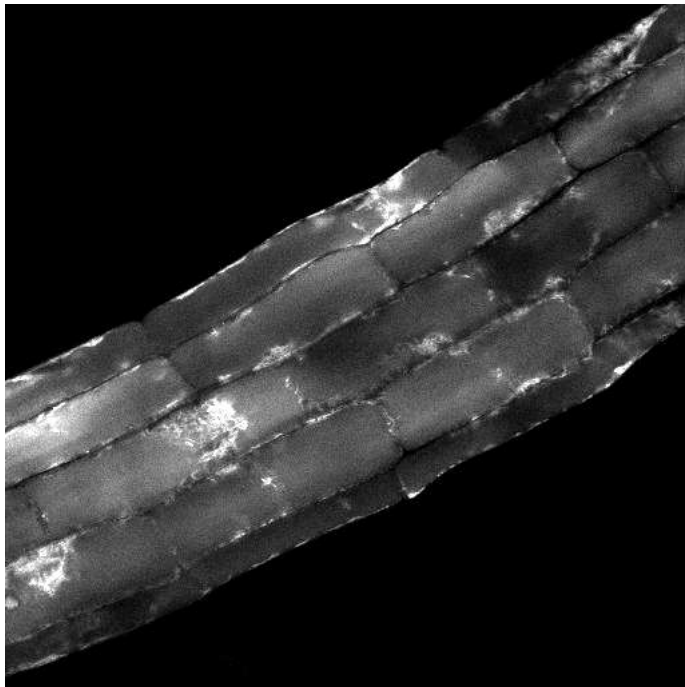

Ox

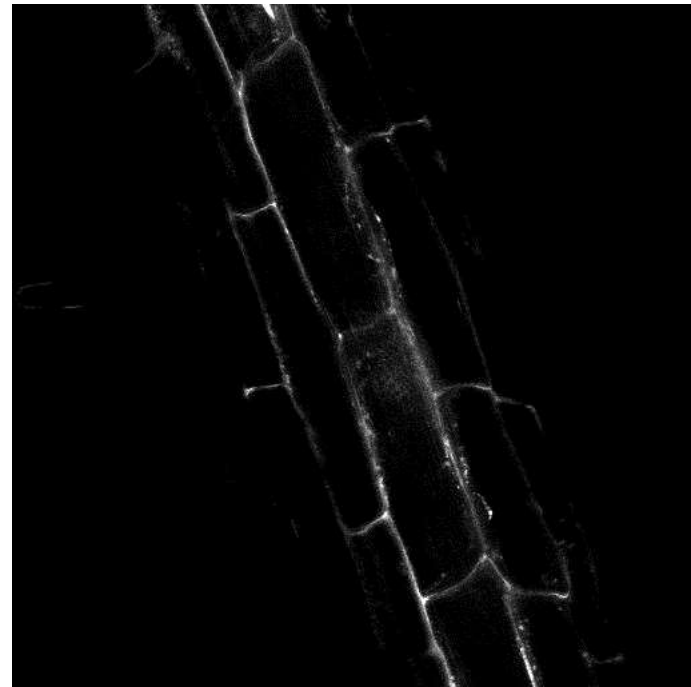

Zn



# Acknowledgments

This research was performed in the frame of the scientific project PTDC/BIAFBT/32013/2017, funded by the Portuguese Foundation for Science and Technology (FCT) and also supported by national funds through FCT, within the scope of UIDB/05748/2020 and UIDP/05748/2020.

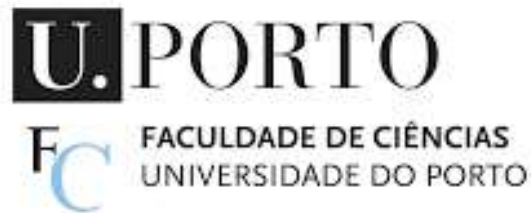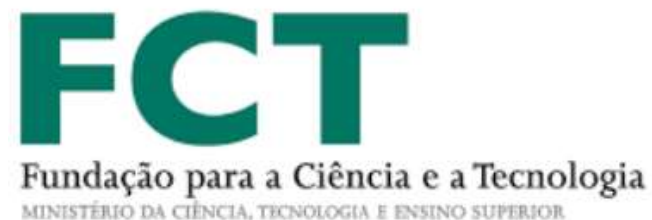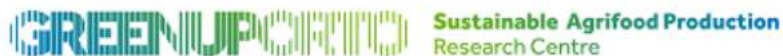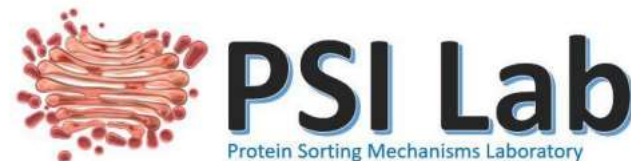

Supplement: s1 [file s1]
